# Supplementary material for: The novel reversible LSD1 inhibitor SP-2577 promotes anti-tumor immunity in SWItch/Sucrose-NonFermentable (SWI/SNF) complex mutated ovarian cancer
Source: PubMed Central journal article supplement (PMC7351179; doi:10.1371/journal.pone.0235705), 2020-07-10
Supplement: pone.0235705.s003.pdf [file pone.0235705.s003.pdf]

Supporting Information for:

**The novel reversible LSD1 inhibitor SP-2577 promotes anti-tumor immunity in SWItch/Sucrose-NonFermentable (SWI/SNF) complex mutated ovarian cancer**

Raffaella Soldi, Tithi Ghosh Halder, Alexis Weston, Trason Thode, Kevin Drenner, Rhonda Lewis, Mohan R. Kaadige, Shreyesi Srivastava, Sherin Daniel Ampanattu, Ryan Rodriguez del Villar, Jessica Lang, Hariprasad Vankayalapati, Bernard Weissman, Jeffrey M. Trent, William P.D. Hendricks and Sunil Sharma

Corresponding author: Sunil Sharma

Email: [ssharma@tgen.org](mailto:ssharma@tgen.org)

**This PDF file includes:**

**S3\_Table\_List of primers used in qPCR**

S3: List of primers used for qPCR

| S3: qPCR primer sequences |                 |                           |
|---------------------------|-----------------|---------------------------|
| Target genes              | Primer labels   | Sequences                 |
| human HERV-K              | HERVK-F         | ATTGGCAACACCGTATTCTGCT    |
|                           | HERVK-R         | CAGTCAAATATGGACGGATGGT    |
| human ERVL                | ERVL-F          | ATATCCTGCCTGGATGGGGT      |
|                           | ERVL-R          | GAGCTTCTTAGTCCTCCTGTGT    |
| human IFN- $\beta$        | hIFN $\beta$ -F | GCCATCAGTCACTTAAACAGC     |
|                           | hIFN $\beta$ -R | GAAACTGAAGATCTCCTAGCCT    |
| human CXCL10              | hCXCL10-F       | TTCCTGCAAGCCAATTTTGTC     |
|                           | hCXCL10-R       | TCTTCTCACCTTCTTTTTTCATTGT |
| human ISG15               | hISG15-F        | CCTTCAGCTCTGACACC         |
|                           | hISG15-R        | CGAACTCATCTTGCCAGTACA     |
| human BRG1                | hBRG1-F         | CCTCTCTCAACGCTGTCCAACCTG  |
|                           | hBRG1-R         | ATCTTGGCGAGGATGTGCTTGCTT  |
| human BRM                 | hBRM-F          | GACGGCTCTCAACTCAAAGCATAC  |
|                           | hBRM-R          | GACGGCGTTTCCTCTCCTGC      |
| human PD-L1               | hPD-L1-F        | AAATGGAACCTGGCGAAAGC      |
|                           | hPD-L1-R        | GATGAGCCCCTCAGGCATTT      |
| human GAPDH               | hGAPDH-F        | AACGGGAAGCTTGTCATCAA      |
|                           | hGAPDH-R        | TGGACTCCACGACGTACTCA      |
